# Supplementary material for: Notoginsenoside R1 Alleviates Oxygen–Glucose Deprivation/Reoxygenation Injury by Suppressing Endoplasmic Reticulum Calcium Release via PLC
Source: PubMed Central journal article supplement (PMC5701215; doi:10.1038/s41598-017-16373-7), 2017-11-24
Supplement: 41598_2017_16373_MOESM1_ESM.pdf [file 41598_2017_16373_MOESM1_ESM.pdf]

**Notoginsenoside R1 Alleviates Oxygen–Glucose Deprivation/Reoxygenation Injury by  
Suppressing Endoplasmic Reticulum Calcium Release via PLC**

Yan Wang<sup>1</sup>, Liu Tu<sup>1</sup>, Yingbo Li<sup>1</sup>, Di Chen<sup>1</sup>, ZhaoLiu<sup>2</sup>, Xuelian Hu<sup>3</sup>, Shali Wang<sup>1\*</sup>

<sup>1</sup>Cerebrovascular Diseases Laboratory, Institute of Neuroscience, Chongqing Medical University,  
Chongqing, 400016, China

<sup>2</sup>Department of Neurology, Chongqing General Hospital, Chongqing, 400013, China

<sup>3</sup>Department of Pharmacy, Second Affiliated Hospital, Third Military Medical University,  
Chongqing, 400037, China

\*Correspondence author:

Cerebrovascular Diseases Laboratory, Institute of Neuroscience, Chongqing Medical University, 1  
Yixueyuan Road, Yuzhong District, Chongqing 400016, China (S. Wang);

Tel: +86-023-68068920, Fax: +86-023-68892728

E-mail addresses: 63557408@qq.com; cqykdswangshali@cqmu.edu.cn

## Supplementary Figure S1

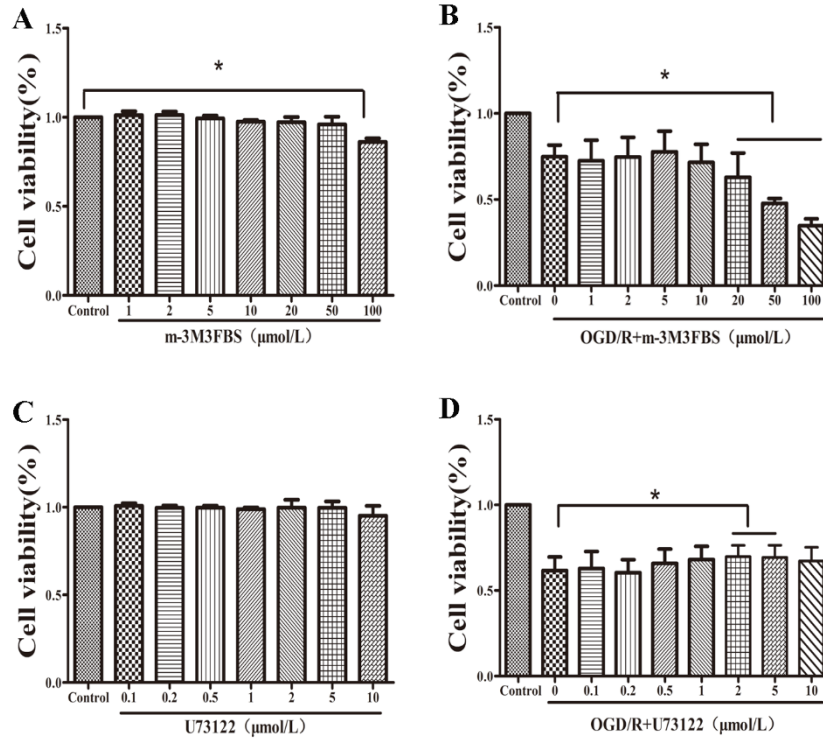

**Suppl Fig.S1.** Concentration-dependent effects of m-3M3FBS or U73122 on cell viability at normal or after OGD/R

## Supplementary Figure S2

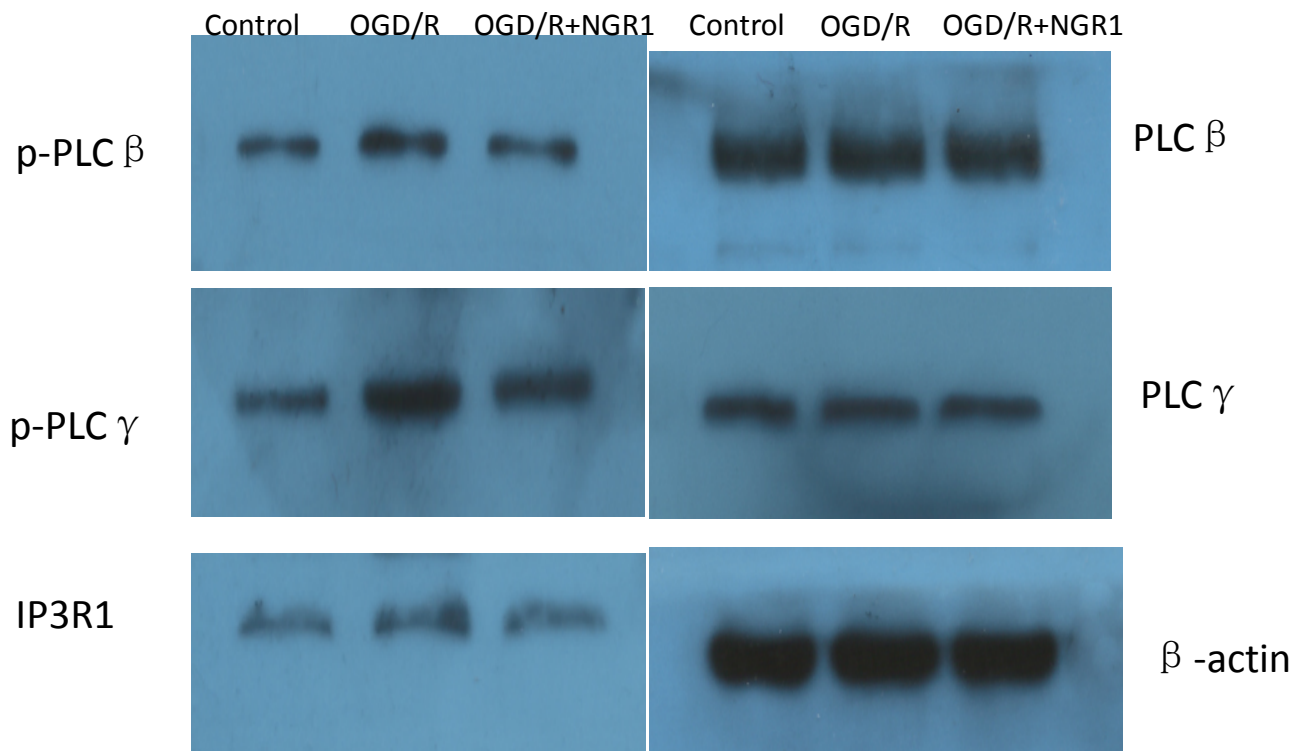

**Suppl Fig.S2.** Original picture of the cropped blots shown in Figure 1.

**Supplementary Figure S3**

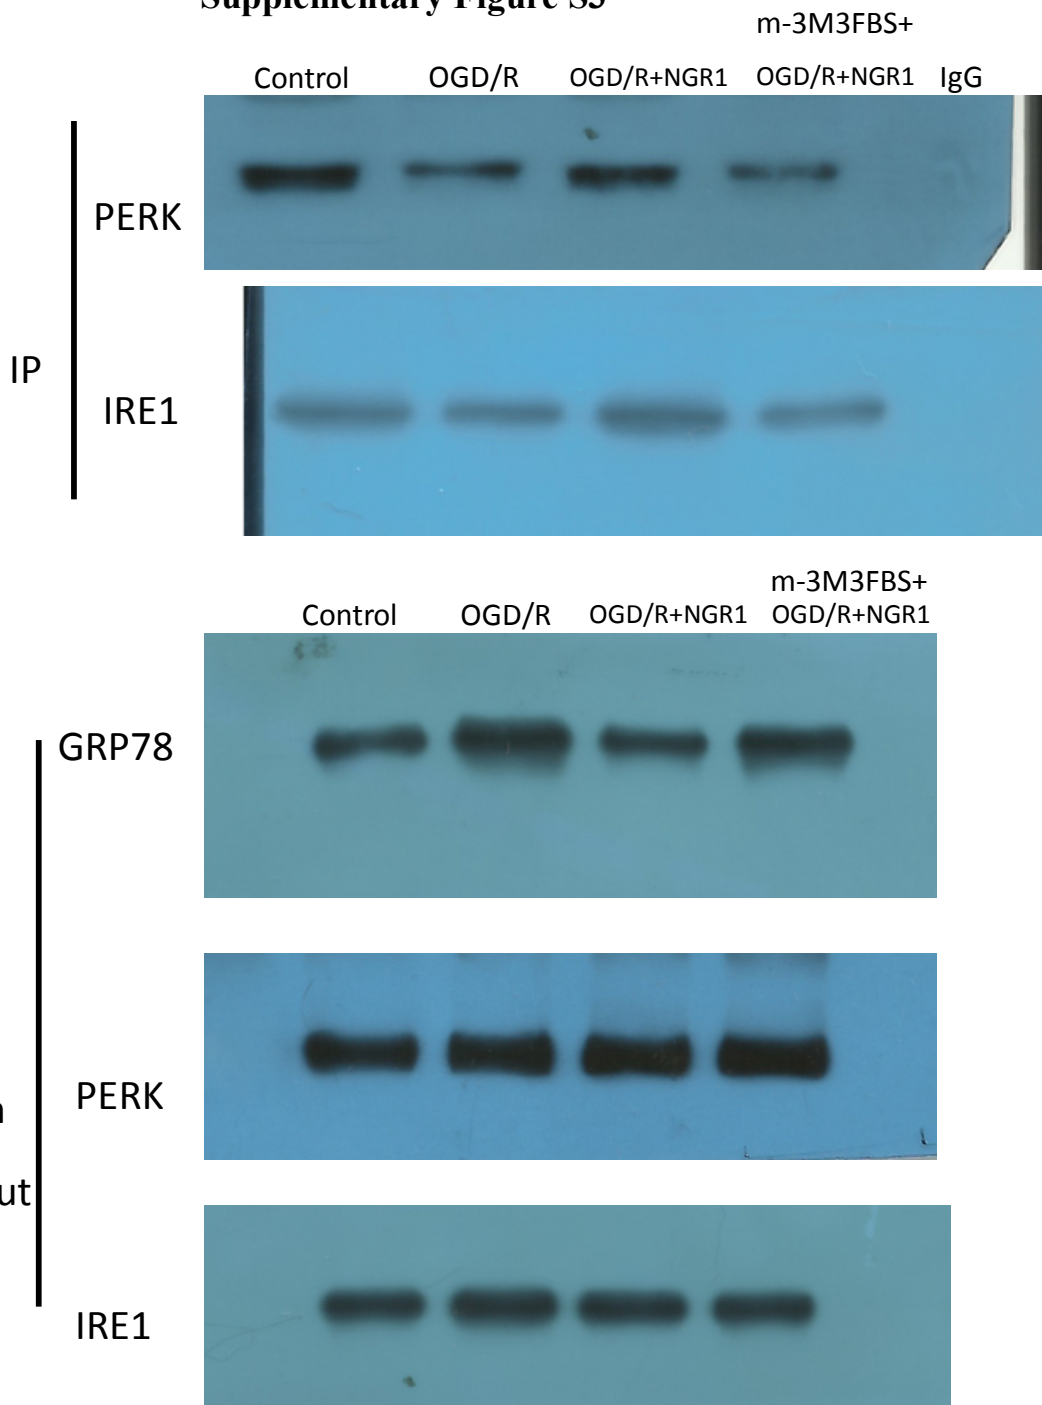

**Suppl Fig.S3.** Original picture of the cropped blots shown in Figure 2.



## Supplementary Figure S4-B

1: Control      2: OGD/R      3: OGD/R+NGR1      4: OGD/R+NGR1+ m-3M3FBS  
5: OGD/R+ m-3M3FBS      6: OGD/R+U73122

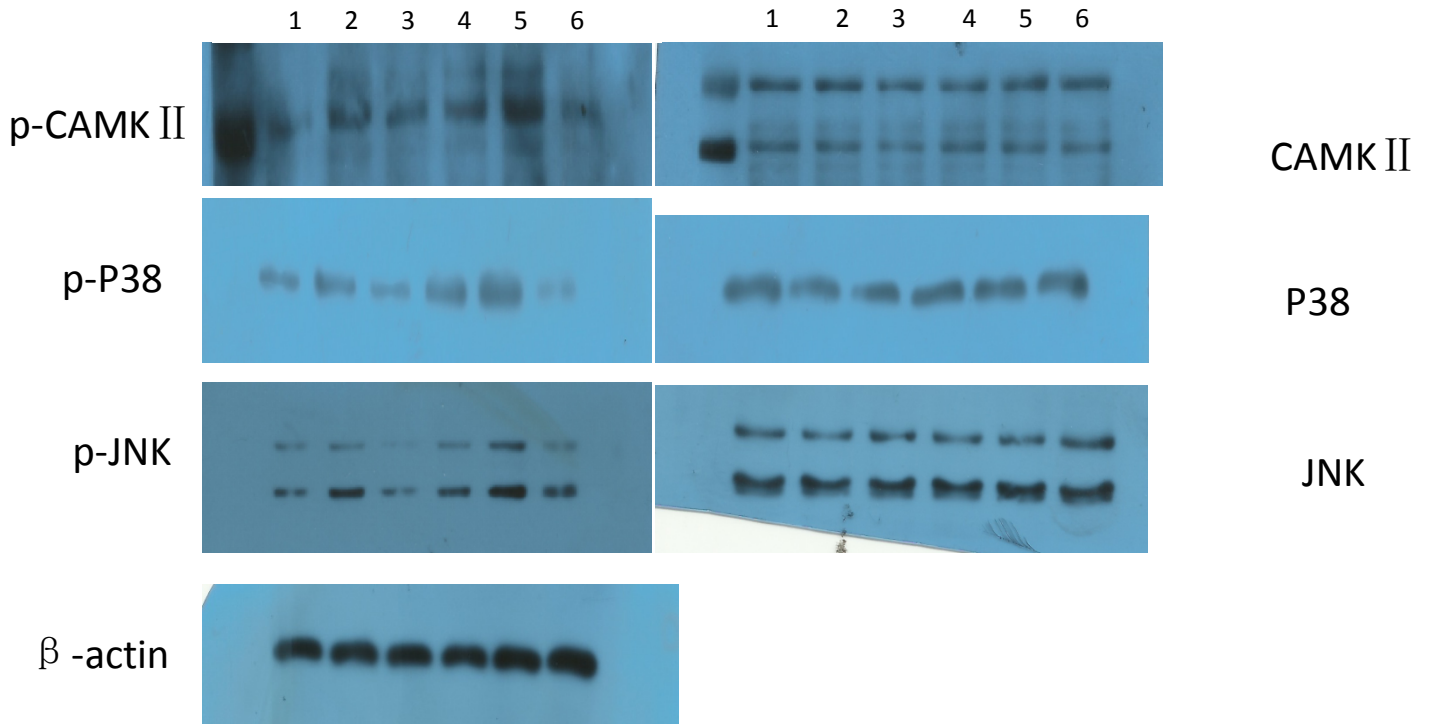

**Suppl Fig.S4.** Original picture of the cropped blots shown in Figure 4.
